# Supplementary material for: Metformin and ICG-001 Act Synergistically to Abrogate Cancer Stem Cells-Mediated Chemoresistance in Colorectal Cancer by Promoting Apoptosis and Autophagy
Source: MDPI journal article supplement (doi:10.3390/cancers14051281), 2022-03-02
Supplement: s1 [file s1]

# Supplementary Material: Metformin and ICG-001 Act Synergistically to Abrogate Cancer Stem Cells-Mediated Chemoresistance in Colorectal Cancer by Promoting Apoptosis and Autophagy

Souvick Roy, Yinghui Zhao, Yate-Ching Yuan and Ajay Goel

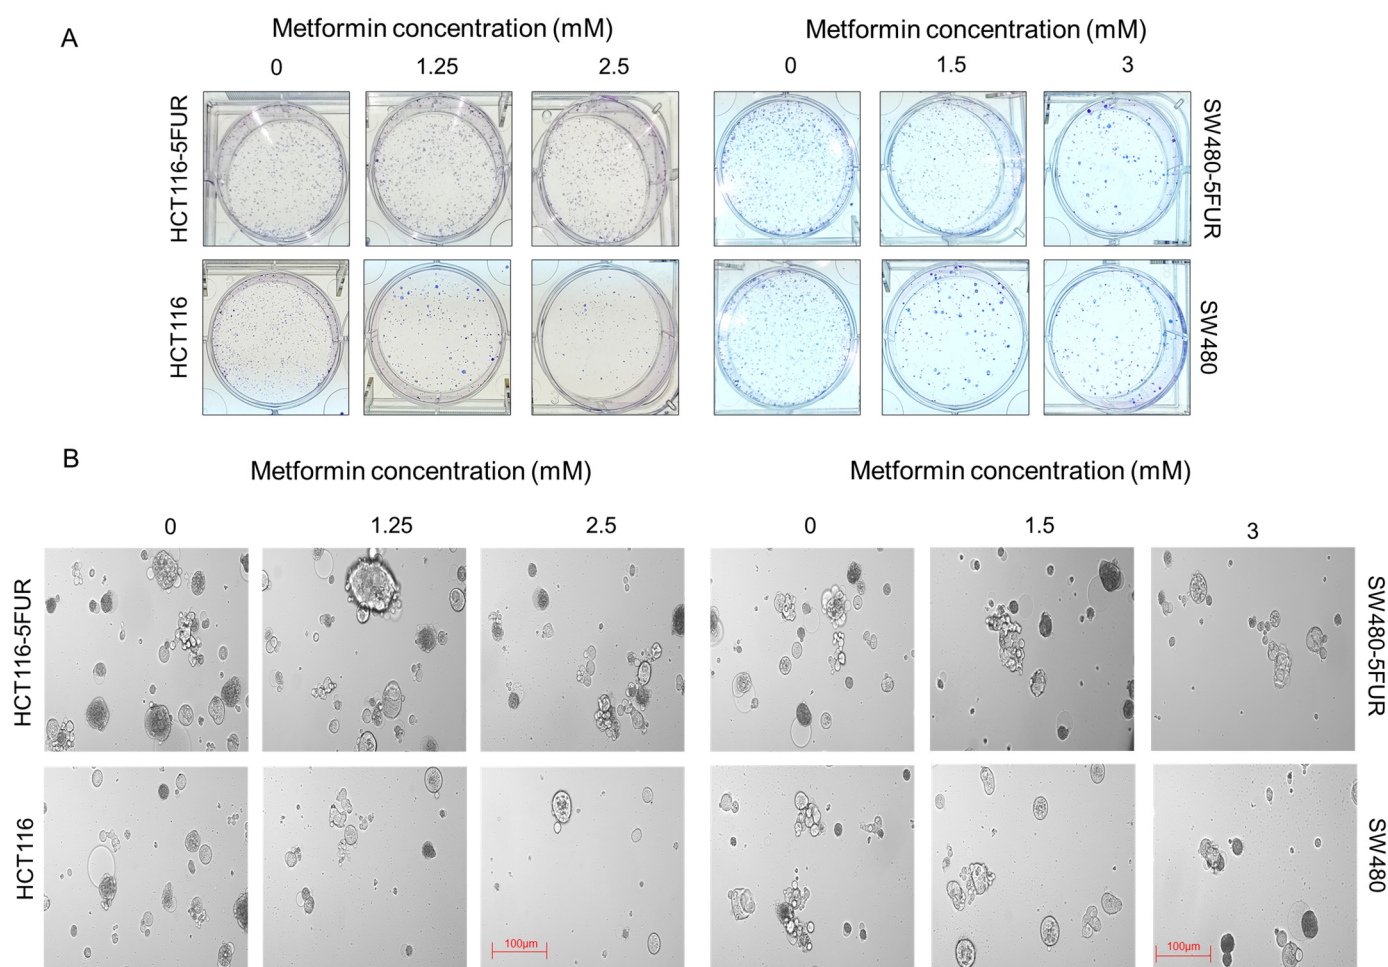

**Figure S1.** (A) Colony forming assay and (B) spheroid forming assay after treatment with different concentrations of metformin for 48 hours in HCT116 and SW480-5FUR and parental cells.

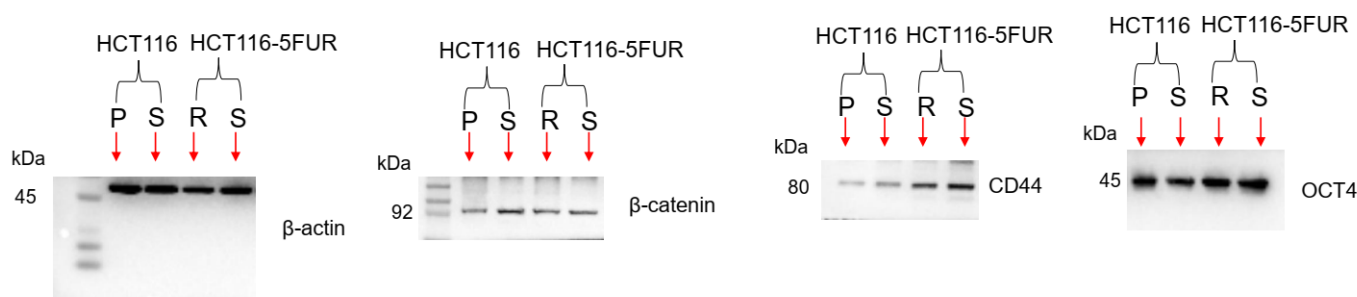

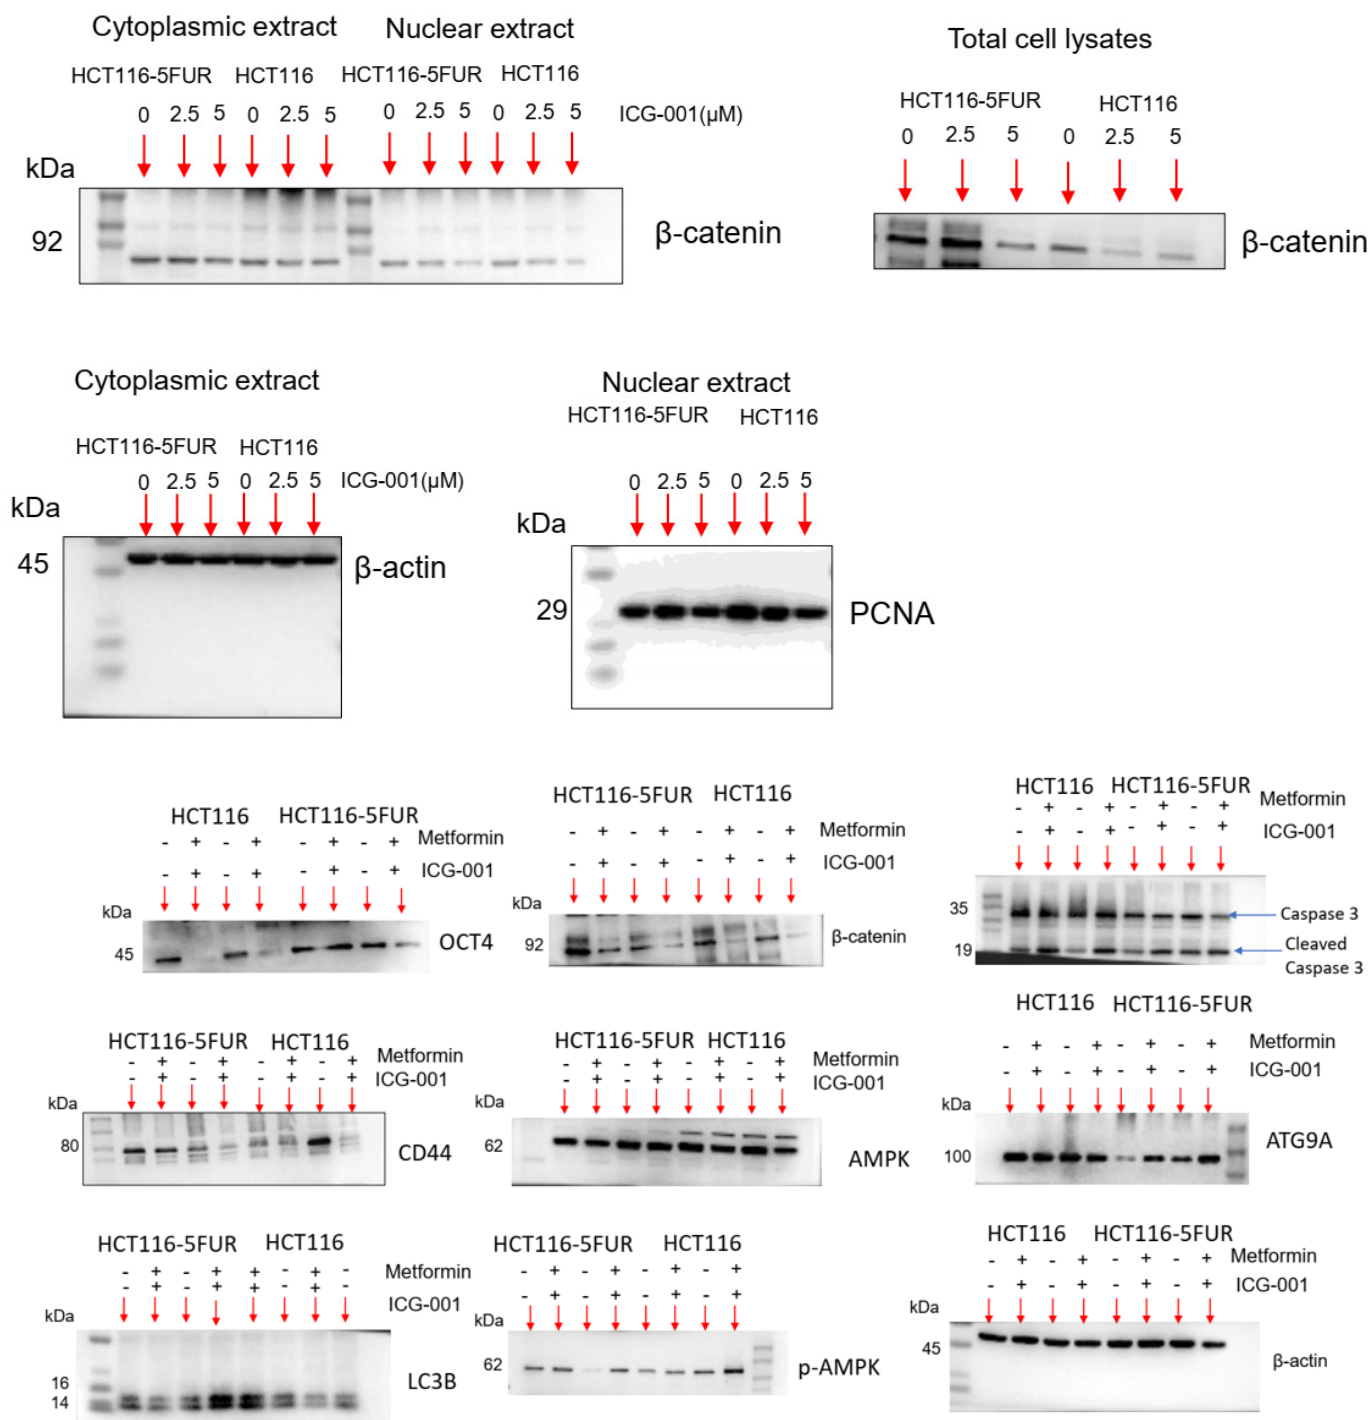

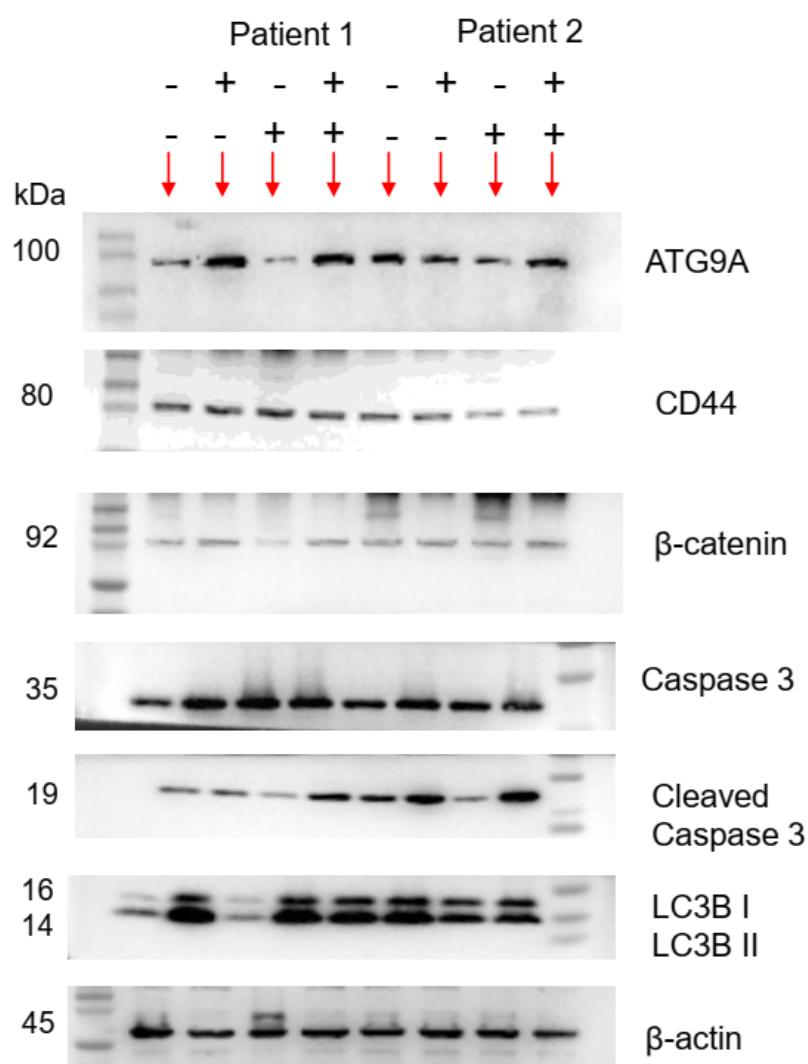

Figure S2. Original blots.

Table S1. Clinical details of the CRC patients used for tumor organoid generation.

| SI No | Patient ID | Age | Gender | Ethnicity | Location of Tumor | TNM Stage | Pathological Stage |
|-------|------------|-----|--------|-----------|-------------------|-----------|--------------------|
| 1     | Patient 1  | 67  | Female | Caucasian | Cecum             | pT4b N1b  | Moderate           |
| 2     | Patient 2  | 40  | Male   | Caucasian | Rectosigmoid      | pT3 N0    | Moderate           |

Table S2. List of primer sequences.

| Genes     | Forward Primer                  | Reverse Primer                 |
|-----------|---------------------------------|--------------------------------|
| β-catenin | 5'-GCTTTCAGTTGAGCTGACCA-3'      | 5'-CAAGTCCAAGATCAGCAGTCTC-3'   |
| CD44      | 5'-CGGACACCATGGACAAGTTT-3'      | 5'-CCGTCCGAGAGATGCTGTAG-3'     |
| OCT4      | 5'-CCTGAAGCAGAAGAGGATCA-3'      | 5'-CCGCAGCTTACACATGTTCT-3'     |
| Caspase 3 | 5'-CAAACCTTTTTCAGAGGGGATCG-3'   | 5'-GCATACTGTTTCAGCATGGCAC-3'   |
| LC3B      | 5'-CGGAAAGCAGCAGTGTACCA-3'      | 5'-GGCAGAAGGGAGTGTGTCTGA-3'    |
| β-actin   | 5'-TCACCCACACTGTGCCCATCTACGA-3' | 5'-CAGCGGAACCGCTCATTGCCAATG-3' |

Table S3. IC<sub>50</sub> value of metformin and ICG-001 in different CRC cells.

| Drug      | Cell Line    | IC <sub>50</sub> |
|-----------|--------------|------------------|
| Metformin | HCT116       | 2.5 ± 0.3        |
|           | SW480        | 3.0 ± 0.4        |
|           | HCT116-5FUR  | 5.0 ± 0.5        |
|           | SW480-5FUR   | 7.6 ± 0.4        |
|           | SW620        | 7.4 ± 0.5        |
|           | RKO          | 8.0 ± 0.6        |
|           | HT29         | 5.9 ± 0.4        |
| ICG-001   | HCT 116      | 4.4 ± 0.5        |
|           | SW480        | 4.7 ± 0.3        |
|           | HCT 116 5FUR | 6.5 ± 0.5        |
|           | SW480 5FUR   | 5.6 ± 0.3        |

**Table S4.** List of top 10 upregulated and downregulated genes between 5FU-resistant and parental colorectal cancer cells.

| Upregulated Genes                              |                     | Downregulated Genes |                     |
|------------------------------------------------|---------------------|---------------------|---------------------|
| Gene symbol                                    | Log <sub>2</sub> Fc | Gene symbol         | Log <sub>2</sub> Fc |
| SPARC                                          | 8.03                | PSG1                | −10.91              |
| ADD2                                           | 7.16                | KRT5                | −9.24               |
| OASL                                           | 6.30                | TRIM29              | −8.95               |
| IFIT2                                          | 6.29                | NELL2               | −8.67               |
| IFIT1                                          | 5.95                | CLDN1               | −8.59               |
| CCL5                                           | 5.73                | MAP7D2              | −8.55               |
| IFIT3                                          | 5.50                | NRIP1               | −8.32               |
| CHRM1                                          | 5.32                | CSMD3               | −8.24               |
| LONRF2                                         | 5.23                | CBS                 | −8.19               |
| FEV                                            | 5.10                | ARHGEF38            | −8.15               |
| Log <sub>2</sub> Fc= 5FU-resistant vs Parental |                     |                     |                     |
